# Supplementary material
Source: publisher site journal article supplement (https://cdn.jamanetwork.com/ama/content_public/journal/intemed/926555/ild120109_supp.xls)
Supplement: Supplementary file 1 [file ild120109_supp.xls]

## Sheet: Explanation
Explanation of this spreadsheet
This is an eAppendix for:
Doshi P, Jefferson T. The first 2 years of the European Medicines Agency’s policy on access to documents: secret no longer. Arch Intern Med. doi:10.1001/jamainternmed.2013.3838
The "EMA request logfile" sheet of this spreadsheet contains the original logfile of requests Peter Doshi
received from EMA, with five corrections that were confirmed by EMA. These are:
(1) Line 445 (Humira) answer is missing an answer for “Access”. Should be "Partial"
(2) Line 221 (Lamictal). Replied date should be 27/7/2012
(3,4) Line 323 Byetta (exenatide); Bydureon (exenatide). Replied date should be 26/11/2012 and pages should be 21,321.
(5) Line 366 Pharmacovigilance fees. Replied date should be 03/10/2012 (October 3, 2012).
The corrected values have been highlighted in dark green to denote the edits. No other cells were altered.
Peter Doshi, December 11, 2012 <pnd@jhu.edu>

## Sheet: EMA request logfile
Product / subject	Category of documents requested	Affiliation according to social and occupational profile	Received	Closed Pending Open	Replied	Access	Pages released
Avandia (sosiglitazone)	Mixed documents	Academia	2010-12-14	Closed	2011-01-13	Partial	1048
Somatropin	Studies	Financial sector	2010-12-13	Closed	2011-01-14	No	0
Tasocitinib	Dossier, SA	Legal	2010-12-16	Closed	2011-01-18	No	0
Ariclaim (duloxetine); Cymbalta (duloxetine); Xeristar (duloxetine); Yentreve (duloxetine)	CSR	Healthcare Professional	2010-12-15	Closed	2011-05-16	Partial	13731
Infanrix HepB	Mixed documents	Legal	2010-12-16	Closed	2011-02-16	Yes	247
Avonex (interferon beta-1a)	AR, minutes, Dossier, CSR	General Public	2010-11-30	Closed	2011-02-04	Partial	18
Travatan (travoprost)	AR, PSUR	Media	2010-12-21	Closed	2011-01-21	Partial	474
H1N1 (pandemic influenza vaccine)	PhVWP	Institution	2010-10-20	Closed	2011-02-08	Yes	42
Plavix (clopidogrel)	CSR	Media	2011-01-04	Closed	2012-09-06	Partial	70291
Agreal (veralipride)	Referral documents	Patients organisation	2010-12-07	Closed	2011-03-10	Partial	404
Anorectics; benfluorex (Mediator)	Minutes, Opinion	General Public	2011-01-14	Closed	2011-01-14	Partial	208
DoI	DOI	Industry	2011-01-07	Closed	2011-01-28	Partial	4
Inspection Reports	Inspection Reports	Industry	2011-01-07	Closed	2011-01-20	No	0
Tovias (fesoterodine); Emselex (darifenacin hydrobromide)	Dossier, Mix	Industry	2011-01-10	Closed	2012-06-01	Partial	13616
Tredaptive (nicotinic acid / laropiprant)	Mixed documents	General Public	2010-11-30	Closed	2011-05-05	Partial	780
Acomplia (rimonabant)	CSR	Legal	2010-02-17	Closed	2011-02-03	Partial	101769
Erbitux (cetuximab); Movectro (cladribine)	Mixed documents	Financial sector	2010-12-01	Closed	2011-02-03	Partial	402
Benfluorex	Mixed documents	Institution	2011-01-06	Closed	2011-02-01	Partial	60
Tamiflu (oseltamivir); Relenza (zanamivir)	CSR	Academia	2011-01-11	Closed	2011-05-26	Yes	25485
Acomplia (rimonabant); Xenical (orlistst)	CSR	Academia	2010-12-17	Closed	2011-01-31	Partial	110484
PhVWP	PhVWP	Industry	2011-01-24	Closed	2011-01-31	Partial	9
Benfluorex	Mixed documents	Legal	2011-01-25	Closed	2011-02-15	Yes	5
Movectro (cladribine)	CSR	Media	2011-01-26	Closed	2011-02-07	No	0
Litak (cladribine)	COMP	Industry	2011-01-27	Closed	2011-03-10	Yes	42
Inspection reports	Inspection reports	Industry	2011-01-28	Closed	2011-02-08	No	0
Orphan designation product	Minutes	Industry	2011-01-28	Closed	2011-02-18	Yes	10
Lumiracoxib (lumiracoxib)	AR	Industry	2011-02-03	Closed	2011-02-24	Partial	129
Tasocitinib	SA	Legal	2011-02-04	Closed	2011-02-17	No	0
Combivir (lamivudine / zidovudine)	Dossier, Mixed documents	Legal	2011-02-03	Closed	2011-05-26	Partial	318
Thomas Lönngren	Correspondence	Media	2011-02-07	Closed	2011-02-16	Partial	2
NSAIDs	AR	Industry	2011-02-07	Closed	2011-02-25	Partial	39
Valdoxan (agomelatine)	CSR	Academia	2011-02-10	Closed	2011-05-16	Partial	39149
Brilique (ticagrelor); Clopidogrel (clopidogrel)	PDCO Summary Rep	Industry	2011-02-11	Closed	2011-02-15	No	0
Duloxetines	SSRIs	Academia	2011-02-10	Batch Release	2012-11-15	Partial	62721
Movectro (cladribine)	CSR	Media	2011-02-11	Closed	2011-03-03	Yes	254251
Arielle North	DOI	Media	2011-02-11	Closed	2011-02-15	Yes	5
Xarelto (rivaroxaban)	SA	Academia	2010-12-29	Closed	2011-03-14	Partial	23
Lyrica (pregabalin)	PSURs	Media	2011-02-15	Closed	2011-04-26	Partial	2378
Zyprexa (olanzapine)	PSURs	Media	2011-02-15	Closed	2011-03-29	Partial	2022
Somatropin	Referral documents	Institution	2011-02-17	Closed	2011-02-28	No	0
Benfluorex (Mediator)	Mixed documents	Media	2011-02-24	Closed	2011-05-31	Partial	136
Amfepramone	AR, OP	Academia	2011-02-04	Closed	2011-02-24	Yes	117
Somatropin	SAGhE study, Referral	Institution	2011-02-18	Closed	2011-03-02	No	0
Avonex (interferon beta-1a)	AR, minutes, CSR	General Public	2011-02-25	Closed	2011-03-18	Partial	4
Thomas Lönngren	Correspondence	Media	2011-02-22	Closed	2011-03-15	No	0
Thomas Lönngren	Correspondence	Institution	2011-02-10	Closed	2011-03-01	Partial	2
Agreal (veralipride)	Referral documents	General Public	2011-02-04	Closed	2011-03-10	Partial	404
Agreal (veralipride)	Referral documents	General Public	2011-02-09	Closed	2011-03-10	Partial	404
Thomas Lönngren	Correspondence	Media	2011-02-11	Closed	2011-03-04	No	0
Thomas Lönngren	Correspondence	Institution	2011-03-07	Closed	2011-03-11	No	0
EMA contracts	Contracts	Institution	2011-08-19	Closed	2011-09-29	No	0
Somatropin	SAGhE study, Referral	Industry	2011-01-13	Closed	2011-03-04	No	0
Modafinil	DHPC	Media	2011-03-03	Closed	2011-03-10	Yes	2
Simponi (golimumab)	DHPC	Healthcare Professional	2011-03-09	Closed	2011-03-28	Yes	1
Feligen (feline vaccine); Leucogen (feline vaccine)	PSURs	Institution	2011-03-09	Closed	2011-03-15	No	0
Roaccutane (isotretinoin)	XML, Variables	Media	2011-03-01	Closed	2011-03-22	Yes	64
Buflomedil	Referral documents	Industry	2011-03-21	Closed	2011-09-09	Yes	1080
Combivir (lamivudine / zidovudine)	Dossier, Mixed documents	Legal	2011-03-21	Closed	2011-03-25	Partial	49
Lucentis (ranibizumab)	Letter of undertaking	Industry	2011-03-21	Closed	2011-04-12	Partial	5
Abilify (aripiprazole)	AR	Industry	2011-03-22	Closed	2011-04-13	Partial	26
GCP	Presentations	Industry	2011-03-08	Closed	2011-05-17	Yes	134
Vfend (voriconazole); Eclasta; Candidas	PIP	Industry	2011-03-28	Closed	2011-04-19	Partial	77
Fluoroquinolones	PhVWP docs	Institution	2011-03-11	Closed	2011-04-27	Yes	54
Tarceva (erlotinib)	DOI, Minutes	Media	2011-03-29	Closed	2011-04-20	Partial	39
Valdoxan (agomelatine)	PSURs	Media	2011-03-29	Closed	2011-05-16	Partial	335
Vantas	AR	Media	2011-03-29	Closed	2011-04-12	Partial	11
Somatropin	SAGhE study, Referral	Industry	2011-03-30	Closed	2011-04-19	No	0
Feraheme	3rd party documents	Industry	2011-03-24	Closed	2011-03-31	No	0
Methylphenidate	Letter	Media	2011-03-31	Closed	2011-04-11	No	0
SWP	Guideline	Legal	2011-04-16	Closed	2011-05-11	Partial	12
HMPC	HMPC	Industry	2011-04-14	Closed	2011-05-10	Yes	15
Midostaurin	PIP	Industry	2011-04-14	Closed	2011-04-24	No	0
Thomas Lönngren	Correspondence	Media	2011-04-19	Closed	2011-05-13	Yes	1
Cymbalta (duloxetine)	PSURs	Legal	2011-04-21	Closed	2012-01-10	Partial	4027
Telematics	Minutes, Report	Industry	2011-04-20	Closed	2011-06-20	Partial	18
Telematics	Report	Industry	2011-04-21	Closed	2011-06-20	Yes	18
Tienam	AR	Media	2011-04-21	Closed	2011-05-18	Partial	59
Vantas	AR	Media	2011-04-21	Closed	2011-05-17	Partial	38
Agreal (veralipride)	AR, Minutes, LoQ, LoOI	General Public	2011-04-19	Closed	2011-05-25	Partial	496
Triclabendazole (ivermectin, triclabendazole)	AR	Industry	2011-04-05	Closed	2011-04-13	No	0
MoU	MoU	Industry	2011-05-03	Closed	2011-06-09	Yes	4
Diacomit (stiripentol); Fabrazyme (agalsidase beta); Pedea (ibuprofen)	COMP	Patients organisation	2011-05-09	Closed	2011-05-13	Yes	32
Pandemrix (pandemic influenza vaccine)	Minutes	Institution	2011-05-06	Closed	2011-05-27	Partial	2
Fluoroquinolones	PhVWP AR	Institution	2011-03-23	Closed	2011-04-27	Yes	54
Palexia	SA	Industry	2011-05-31	Closed	2011-07-22	No	0
Circadin (melatonin)	PIP	Healthcare Professional	2011-05-13	Closed	2011-06-06	No	0
RoActemra (tocilizumab)	AR, CTD	Legal	2011-05-16	Closed	2012-02-13	Partial	30788
Buflomedil	Minutes	Industry	2011-05-18	Closed	2011-05-30	No	0
Efexor	Referral	General Public	2011-05-19	Closed	2012-04-03	Partial	7741
Mircera (methoxy polyethylene glycol-epoetin beta)	AR, PIP	Industry	2011-05-20	Closed	2011-11-14	Partial	3711
Remicade (infliximab)	Correpondence, CTR, AR	Legal	2011-05-24	Batch Release	2012-11-09	Partial	46116
Valdoxan (agomelatine)	PSURs	Media	2011-03-29	Closed	2011-05-16	Partial	185
Actos (pioglitazone)	Mixed documents	Academia	2011-06-20	Closed	2012-01-11	VOID	0
Paracetamol	PhVWP AR	Media	2011-05-31	Closed	2011-06-27	Partial	31
Acomplia (rimonabant)	AR, Dossier	General Public	2011-05-13	Closed	2011-08-10	Partial	108890
H1N1 (pandemic influenza vaccine)	Minutes	Institution	2011-06-07	Closed	2011-06-28	Partial	6
Xolair (omalizumab)	AR	Academia	2011-05-19	Closed	2011-07-07	Partial	195
Isomeride	DOI	Media	2011-06-20	Closed	2011-06-22	Yes	1
Ken Woods	Presentation	Industry	2011-06-20	Closed	2011-06-22	Yes	19
RD114	IFAH paper, study	Academia	2011-06-24	Closed	2011-07-14	Partial	1
EllaOne (ulipristal acetate)	Mixed documents	Healthcare Professional	2011-06-28	Closed	2011-11-25	VOID	0
Clopidogrel (clopidogrel)	PIP, PDCO	Industry	2011-06-26	Closed	2011-07-25	Partial	110
Tranexamic acid	Referral	Industry	2011-06-29	Closed	2011-07-27	Partial	64
Prevenar	Dossier	Industry	2011-07-05	Closed	2011-11-18	Partial	3892
QWP	QWP	Industry	2011-07-13	Closed	2011-07-14	Yes	5
Cymbalta (duloxetine)	PSURs	Legal	2011-03-25	Closed	2012-01-11	Partial	4027
XGEVA (denosumab)	DOI	Industry	2011-07-27	Closed	2011-08-09	Partial	44
Brilique (ticagrelor)	CSR	Industry	2011-08-11	Closed	2011-08-25	Partial	240843
EMA contracts	Contracts	Institution	2011-08-08	Closed	2011-09-29	No	0
Enbrel (etanercept); Herceptin (trastuzumab); MabThera (rituximab); Remicade (infliximab)	Dossier, RMP, SA, CSR, Var	Consultant	2011-07-11	Batch Release	2012-10-23	Partial	11229
Neulasta (pegfilgrastim)	PSURs	Industry	2011-07-11	Closed	2011-11-03	VOID	0
Telematics	EU Telematics	Industry	2011-07-12	Closed	2011-08-03	No	0
Rapid Alert List	Rapid Alert List	Industry	2011-07-13	Closed	2011-08-03	No	0
Vidaza (azacitidine)	Vet reports	Industry	2011-07-14	Closed	2011-11-11	Partial	20
Procox (toltrazuril)	MRL Report	Academia	2011-07-15	Closed	2011-09-21	Partial	210
Atripla (efavirenz / emtricitabine / tenofovir disoproxil fumarate)	Dossier, Mixed documents	Legal	2011-07-19	Closed	2011-08-25	Partial	4
Viread (tenofovir disoproxil fumarate)	Dossier, Mixed documents	Legal	2011-07-19	Closed	2011-08-25	Partial	4
Truvada (Emtricitabine / tenofovir disoproxil fumarate)	Dossier, Mixed documents	Legal	2011-07-19	Closed	2011-08-25	Partial	7
Aciclovir Hydrocortisone	PIP	Industry	2011-07-04	Closed	2011-08-15	Partial	52
Tender	Tender	Industry	2011-07-07	Closed	2011-08-19	Partial	2404
Kivexa (abacavir / lamivudine)	Dossier, Mixed documents	Legal	2011-07-26	Closed	2011-09-06	Partial	20
Trizivir (abacavir / lamivudine / zidovudine)	Dossier, Mixed documents	Legal	2011-07-26	Closed	2011-09-06	Partial	16
Actos (pioglitazone)	RMP	Industry	2011-07-28	Closed	2011-08-19	Yes	491
Thyme; Primrose	HMPC Minutes	Legal	2011-06-29	Closed	2011-12-13	Partial	4
Infanrix Hexa	CSR	Institution	2011-08-02	Closed	2012-05-23	Partial	16170
Plavix (clopidogrel)	AR	Industry	2011-07-25	Closed	2012-01-27	Yes	11
Ramipril (acetylsalicylic acid)	AR	Media	2011-08-10	Closed	2011-09-21	Partial	358
Tracleer (bosentan)	AR	Industry	2011-08-11	Closed	2011-09-23	Partial	19
PhVWP minutes	Minutes	Industry	2011-08-11	Closed	2011-09-05	Partial	4
Pioglitazone	Study	Legal	2011-06-30	Closed	2011-08-22	Yes	40
Fortum	AR	Consultant	2011-08-18	Closed	2011-08-24	Yes	54
Pandemrix (pandemic influenza vaccine)	Mixed documents	Financial sector	2011-08-18	Closed	2011-08-31	No	0
Parkinson's guideline	Guideline	Industry	2011-08-18	Closed	2011-09-08	Yes	11
Bayovac IBR-Marker Vivum	RFI???	Legal	2011-08-31	Closed	2011-09-13	No	0
Atripla (efavirenz / emtricitabine / tenofovir disoproxil fumarate)	Minutes, Correspondence	Legal	2011-09-06	Closed	2011-09-28	Partial	28
Truvada (Emtricitabine / tenofovir disoproxil fumarate)	Correspondence	Legal	2011-09-06	Closed	2011-09-28	Partial	16
Viread (tenofovir disoproxil fumarate)	Correspondence	Legal	2011-09-06	Closed	2011-09-28	Partial	14
Silodyx (silodosin)	AR	General Public	2011-09-25	Closed	2011-10-28	Partial	7383
Tranexamic acid	ADRs	Media	2011-09-08	Closed	2011-11-04	Yes	494
Clinical Trials	CSR	Media	2011-09-26	Closed	2011-12-02	No	0
Ristfor (sitagliptin / metformin hydrochloride)	RMP	Industry	2011-09-12	Closed	2011-10-05	Yes	127
Enbrel (etanercept)	PSURs	Legal	2011-09-14	Closed	2012-07-11	Partial	63694
EllaOne (ulipristal acetate)	AR	Academia	2011-09-13	Closed	2011-09-29	Yes	40
Pioglitazone	RMP	Industry	2011-09-23	Closed	2011-10-13	Yes	491
Granisetron	EU harmonisation	Media	2011-09-14	Closed	2011-10-14	Partial	344
Somatropin	SAGhE study, Referral	Institution	2011-09-14	Closed	2011-12-21	No	0
Cimzia (certolizumab pegol); Enbrel (etanercept); Humira (adalimumab); Orencia (abatacept); Remicade (infliximab); Simponi (golimumab)	PSURs	Industry	2011-09-22	Closed	2012-07-23	Partial	50607
Regulatory & Procedural Guidance	Archived documents	Industry	2011-10-04	Closed	2011-11-10	No	0
Filgrastim	Correspondence, Presentations	Legal	2011-09-30	Closed	2012-03-23	Partial	165
Epoetin Alpha - correspondence	Correspondence	Legal	2011-10-03	Closed	2011-12-22	Partial	63
Epoetin Alpha - marketing	Marketing	Legal	2011-10-03	Closed	2012-02-29	Partial	114
Enoxaparin - correspondence	Correspondence	Legal	2011-10-03	Closed	2011-11-07	No	0
Enoxaparin - marketing	Marketing	Legal	2011-10-03	Closed	2011-11-07	No	0
Formindep	DoI	Media	2011-10-05	Closed	2011-10-26	Yes	44
Pholcodine	DoI	Industry	2011-10-06	Closed	2011-10-06	Yes	10
Orphacol (cholic acid)	Correspondence, Meeting documents	Industry	2011-07-12	Closed	2012-02-15	Partial	94
MoU	MoU	Industry	2011-05-03	Closed	2011-06-09	Yes	4
Peritoneal dialysis	Report	Academia	2011-10-09	Closed	2011-12-06	VOID	0
Fluvastatin	EU harmonisation	Media	2011-10-13	Closed	2011-11-17	Partial	183
Zalasta (olanzapine)	Archived documents	Media	2011-10-17	Closed	2011-10-25	Yes	10362
Seroxat	PL	General Public	2011-11-07	Closed	2011-11-28	Yes	2436
Kivexa (abacavir / lamivudine)	Dossier, Mixed documents	Legal	2011-10-20	Closed	2011-12-19	Partial	1466
Gardasil	AR	Media	2011-10-21	Closed	2011-11-16	Yes	36
Orlaam (levacetylmethadol)	Dossier	Industry	2011-10-21	Batch Release	2012-11-13	Partial	1762
Diflucan (fluconazole)	AR	Consultant	2011-10-24	Closed	2011-11-24	Yes	25
Tarceva (erlotinib)	AR	Media	2011-10-21	Closed	2011-11-04	No	0
Reboxetine	AR	Industry	2011-10-26	Closed	2011-11-18	Partial	37
Mitotane (lysodren)	Dossier	Industry	2011-10-25	Closed	2011-12-21	Yes	44
Orlistat	RMP	Industry	2011-10-28	Closed	2011-12-09	Partial	357
Focetria (pandemic influenza vaccine); Pandemrix (pandemic influenza vaccine)	Mixed documents	Academia	2011-10-29	Batch Release	2012-07-09	Partial	25055
Budget	MB documents	Media	2011-11-03	Closed	2011-11-07	Yes	174
Internal Audit Service	Audit reports	Media	2011-11-03	Closed	2011-12-14	Partial	55
NovoRapid (insulin aspart); Levemir (insulin detemir)	Dossier, Mixed documents	General Public	2011-11-08	Closed	2011-12-02	No	0
Actos (pioglitazone); Competact (pioglitazone / metformin)	PL, SPC	Industry	2011-10-26	Closed	2011-11-10	No	0
Permethrin	Epidemiological data	Academia	2011-09-13	Closed	2011-11-11	Partial	825
API Manufacturers	Master list	Industry	2011-10-24	Closed	2011-11-24	No	0
Glybera (alipogene tiparvovec)	Meeting minutes	Industry	2011-11-14	Closed	2011-11-17	No	0
Tobi Podhaler (tobramycin)	Dossier, Mixed documents	Legal	2011-11-18	Batch Release	2012-11-13	Partial	1244
EU/1/06/344/001-009	EPAR	Media	2011-11-18	Closed	2012-02-08	VOID	0
Octenidine	Line Listing	Industry	2011-10-26	Closed	2011-11-21	Yes	287
Eudravigilance Biosimilar switching	ADRs	Academia	2012-01-20	Closed	2012-02-03	Partial	1502
Truvada (Emtricitabine / tenofovir disoproxil fumarate)	Dossier, Mixed documents	Legal	2011-12-07	Batch Release	2012-11-13	Partial	1290
HFA 134a	AR	Industry	2011-11-23	Closed	2012-02-09	Yes	4
HFA 227ea	AR	Industry	2011-11-23	Closed	2011-12-19	Yes	3
Yas	Correspondence	Media	2011-11-23	Closed	2011-12-14	Partial	7
Yasmin	Correspondence	Media	2011-11-23	Closed	2011-12-19	Partial	13
Thomas Lönngren	Correspondence	Media	2011-11-25	Closed	2011-12-21	No	0
Biosimilar; Heparins	Dossier	Legal	2011-11-24	Closed	2012-02-10	No	0
Pradaxa (dabigatran etexilate)	Dossier	Media	2011-11-25	Closed	2011-12-09	No	0
Mesalamine salts	Side Effects	Healthcare Professional	2011-11-28	Closed	2012-01-24	Partial	3242
Orlistat	AR	Academia	2011-11-22	Closed	2012-01-13	VOID	0
Glivec (imatinib)	Correspondence	Legal	2011-11-29	Closed	2012-01-18	Partial	20
Agreal (veralipride)	ADRs	Patients organisation	2011-11-29	Closed	2011-12-08	Partial	404
Zoledronic acid	RMP	Industry	2011-12-05	Closed	2012-01-04	Partial	191
Dexamethasone (MRL)	MRL Report	Industry	2011-12-05	Closed	2011-12-06	No	0
Bonviva (ibandronic acid)	Dossier	Industry	2011-12-05	Closed	2012-01-12	No	0
Valdoxan (agomelatine)	Dossier	Industry	2011-12-05	Closed	2012-01-12	No	0
Somatropin	SAGhE study	Academia	2011-12-05	Closed	2011-12-13	No	0
Agreal (veralipride)	Dossier	Patients organisation	2011-12-06	Closed	2011-12-08	Partial	404
Epoetin Zeta	AR	Academia	2011-12-06	Closed	2012-01-24	Partial	146
Atripla (efavirenz / emtricitabine / tenofovir disoproxil fumarate)	Dossier	Legal	2011-12-07	Closed	2012-07-30	Partial	431
Pradaxa (dabigatran etexilate)	Study	Academia	2011-12-09	Closed	2012-02-01	VOID	0
Votrient (pazopanib); Nexafar; Sutent (sunitinib)	Dossier	Industry	2011-12-09	Closed	2012-07-26	Partial	1700
Domperidone	AR	Patients organisation	2011-12-14	Closed	2012-01-27	No	0
NeuroBloc (botulinum toxin type B); InductOs (dibotermin alfa)	ADRs	Academia	2011-12-20	Closed	2012-01-11	Partial	4
Piperazine	PIP, Opinion, Annex I	Industry	2011-12-20	Closed	2011-12-20	No	0
Gilenya (fingolimod)	PSURs	Media	2011-12-22	Closed	2012-02-27	No	0
Tazocin; Tienam	AR	Consultant	2012-01-19	Closed	2012-02-09	Yes	92
Lipitor; Abilify (aripiprazole); Actos (pioglitazone); Plavix (clopidogrel)	CSR	Academia	2011-12-22	Closed	2012-08-06	Partial	13544
Augmentin	AR	Consultant	2011-12-09	Closed	2011-12-22	Partial	79
Eisai	Inspection reports	Industry	2012-01-04	Closed	2012-01-12	No	0
PKWP Position papers	Position papers	Legal	2012-01-07	Closed	2012-02-20	No	0
Antiparasitic drugs	ADRs	Academia	2012-01-12	Closed	2012-01-31	Yes	1441
German Reimbursement rules	AR	Industry	2012-01-06	Closed	2012-01-26	No	0
Thiethylperazine	Dossier	Industry	2012-01-13	Closed	2012-01-26	No	0
Anti-malaria medicines	ADRs	Industry	2012-01-16	Closed	2012-02-08	Partial	47168
Risperidone	Dossier	Industry	2012-01-18	Closed	2012-01-20	No	0
Clopidogrel (clopidogrel); Atorvastatin (atorvastatin)	ASMF	Academia	2012-01-19	Closed	2012-01-27	No	0
Cervarix (human papillomavirus vaccine)	AR	Media	2012-01-20	Closed	2012-02-01	No	0
Lamictal	Dossier	Patients organisation	2012-01-24	Clarification	2012-07-25	Partial	1018
Pandemrix (pandemic influenza vaccine)	FUMs	Media	2012-01-24	Closed	2012-03-02	Yes	33
Hydrocortisone	COMP Opinion, AR	Legal	2012-01-27	Closed	2012-02-02	Yes	8
Tamiflu (oseltamivir)	PSUR, CSR	Media	2012-01-27	Closed	2012-10-18	Partial	14458
Septrin	Ombudsman Decision	Industry	2012-01-31	Closed	2012-02-08	Partial	38104
Lyrica (pregabalin)	CSR, AR, SA, mix	Industry	2012-02-03	Batch Release	2012-11-05	Partial	17115
PIP	PIP	General Public	2012-02-06	Closed	2012-02-21	No	0
Plavix (clopidogrel)	EC Decision	Industry	2012-02-07	Closed	2012-02-09	Yes	29
Milnacipran Pierre Fabre Medicament (milnacipran); Impulsor (milnacipran)	CSRs, AR, LoQ, LoOI, SA	Industry	2012-03-12	Batch Release	2012-06-28	Partial	2257
Pradaxa (dabigatran etexilate)	FUMs	Media	2012-02-21	Closed	2012-03-09	Partial	55
Tienam	Art 30 Referral	Institution	2012-02-07	Closed	2012-02-21	No	0
Zyprexa (olanzapine)	AR	Institution	2012-02-22	Closed	2012-02-22	Yes	29
Actos (pioglitazone)	RMP	Industry	2012-02-23	Closed	2012-03-14	Yes	491
Zeftera (ceftobiprole medocaril)	SAG-AI report	Institution	2012-02-28	Closed	2012-02-29	Yes	3
Anorectic substances	Misc documents	Institution	2012-02-27	Closed	2012-03-21	Partial	17
EllaOne (ulipristal acetate)	Mixed documents	Healthcare Professional	2012-02-29	Closed	2012-03-20	Partial	135
Keratinocytes	ATMP classification report	Academia	2012-03-01	Closed	2012-03-12	Partial	8
Xarelto (rivaroxaban)	PSUR; PIP	Industry	2012-03-13	Closed	2012-07-20	Partial	2940
Thomas Lönngren	Notifications	Institution	2012-03-14	Closed	2012-03-14	No	0
Incivo (telaprevir)	Dossier	Industry	2012-03-15	Closed	2012-03-22	Partial	3
Oral/Rectal Medicinal Products	AR	Industry	2012-03-19	Closed	2012-04-13	Yes	54
Tysabri (natalizumab); Avonex (interferon beta-1a); Rebif (interferon beta-1a); Avastin (bevacizumab)	PSURs	Industry	2012-04-20	Closed	2012-06-15	Partial	3935
Tasigna (nilotinib)	CHMP reports	Legal	2012-03-20	Closed	2012-07-02	Partial	83
ViraferonPeg (peginterferon alfa-2b)	PSURs	Media	2012-03-20	Closed	2012-04-13	Partial	2407
Fluad Paediatric	WPAR	Media	2012-03-20	Closed	2012-04-19	No	0
Pelargonium	CSRs	Media	2012-03-20	Closed	2012-05-04	No	0
Propyl & Methyl-Parabens for pediatric use	CSRs	Industry	2012-03-19	Batch Release	2012-05-29	Partial	639
Mercaptopurine	Dossier	Industry	2012-03-21	Closed	2012-03-28	Partial	11
Zyprexa (olanzapine)	RMP	Consultant	2012-03-22	Closed	2012-05-29	Partial	111
EllaOne (ulipristal acetate)	TBC	Healthcare Professional	2012-03-26	Closed	2012-04-19	Partial	89
Antidepressants	CHMP reports	Media	2012-03-28	Closed	2012-04-23	Partial	91
Herceptin (trastuzumab)	AR	Media	2012-04-20	Closed	2012-04-20	No	0
Acomplia (rimonabant); Zimulti (rimonabant)	AR	Media	2012-04-03	Closed	2012-04-10	Partial	68
Twinrix (hepatitis A (inactivated) / hepatitis B(Rdna) (Hab) vaccine)	PSURs	Patients organisation	2012-03-29	Batch Release	2012-10-19	Partial	3680
Buccolam (midazolam)	PL, SPC	Media	2012-03-30	Closed	2012-04-30	Partial	153
Zyvox (linezolid)	PSURs, minutes	General Public	2012-03-29	Closed	2012-05-22	Partial	113
Actos (pioglitazone)	RMP	Industry	2012-04-03	Closed	2012-04-30	No	0
Abseamed (epoetin alfa)	Correspondence	Legal	2012-04-04	Closed	2012-05-02	No	0
Telmisartan (hydrochlorothiazide)	RMP	Industry	2012-04-10	Closed	2012-05-03	Partial	275
Januvia (sitagliptin)	AR	General Public	2012-04-10	Closed	2012-04-10	Yes	13
Replagal (agalsidase alfa)	Dossier	Media	2012-04-11	Closed	2012-05-16	No	0
Quinoflox; Selenate	Referrals	Legal	2012-04-03	Closed	2012-04-17	No	0
Epivir (lamivudine)	Dossier	Legal	2012-04-12	Closed	2012-05-07	Yes	48
Combivir (lamivudine / zidovudine)	Dossier	Legal	2012-04-12	Closed	2012-05-04	Yes	11
Zelboraf (vemurafenib)	LoQ, LoI, CSRs, RMP	Industry	2012-04-17	Batch Release	2012-10-26	Partial	127
Humira (adalimumab)	SPC	Academia	2012-04-17	Closed	2012-04-17	No	0
Biosimilar Guideline - Quality	Guideline	Legal	2012-04-23	Closed	2012-05-14	Partial	56
Biosimilar Guideline - Non-Clinical & Clinical Issues	Guideline	Legal	2012-04-23	Closed	2012-05-04	Partial	44
Biosimilar Guideline - 3rd Party comments	Guideline	Legal	2012-04-25	Closed	2012-05-04	Partial	29
CAT-ATMP	ATMP data	Academia	2012-04-24	Closed	2012-05-22	Partial	8
Gilenya (fingolimod)	ADRs	Industry	2012-04-25	Closed	2012-05-21	Partial	2490
Velcade (bortezomib)	ADRs	Healthcare Professional	2012-04-24	Closed	2012-05-09	Yes	32
Esbriet (pirfenidon)	RMP	Industry	2012-04-30	Closed	2012-05-03	No	0
Binocrit (epoetin alpha)	Correspondence	Legal	2012-05-04	Closed	2012-05-10	Partial	2
MS studies	Studies	Patients organisation	2012-05-08	Closed	2012-06-08	VOID	0
Gilenya (fingolimod)	PSURs	Industry	2012-05-10	Closed	2012-07-09	Partial	1247
PecFent (fentanyl); Instanyl (fentanyl)	PSURs, AR	Media	2012-05-14	Closed	2012-07-27	Partial	215
Decitabine	SA	Institution	2012-05-15	Closed	2012-06-22	VOID	0
Octagam	Studies	Industry	2012-05-15	Closed	2012-06-08	Partial	13
Lucentis (ranibizumab)	AR	Healthcare Professional	2012-05-20	Closed	2012-06-07	Partial	25
Citalopram; Escitalopram	AR	Media	2012-05-18	Closed	2012-06-11	Partial	68
Comparability Guideline	3rd party documents	Legal	2012-05-22	Closed	2012-06-07	Partial	41
Lucentis (ranibizumab)	AR	Industry	2012-05-22	Closed	2012-06-07	Partial	25
Biosimilar Guideline - Immunogenicity	Guideline	Legal	2012-05-23	Closed	2012-06-07	Partial	174
ATMP classification	AR	Healthcare Professional	2012-05-23	Closed	2012-06-11	Yes	6
Zyvox (linezolid)	PSURs	General Public	2012-05-23	Closed	2012-05-23	No	0
Buflomedil	Correspondence	Industry	2012-05-24	Closed	2012-05-31	Yes	5
Gilenya (fingolimod)	PSURs, RMP, CSR	General Public	2012-06-01	Batch Release	2012-07-25	Partial	1873
Levomethadone	AR	Industry	2012-05-25	Closed	2012-06-07	No	0
Trilostane	Side effects	Academia	2012-05-28	Closed	2012-06-19	Yes	2796
Byetta (exenatide)	AR	Media	2012-05-30	Closed	2012-06-12	Yes	36
Inspection reports	Inspection Reports	Media	2012-05-30	Closed	2012-06-15	Yes	8
Mesilate salts; Sulfonic acid salts	QWP reports	Consultant	2012-05-31	Closed	2012-08-01	Partial	8
Mesilate salts; Sulfonic acid salts	SWP reports	Consultant	2012-05-31	Closed	2012-06-11	No	0
GCP Inspections	Inspection Reports	Consultant	2012-05-11	Closed	2012-07-10	Yes	10
EnPR	Presentation slides	Industry	2012-06-04	Closed	2012-06-07	No	0
Silgard (human papillomavirus vaccine); Cervarix (human papillomavirus vaccine)	CSR	Institution	2012-06-07	Closed	2012-06-22	Partial	330
Eviplera (emtricitabine / rilpivirine / tenofovir disoproxil)	Dossier	Industry	2012-06-08	Batch Release	2012-11-09	Partial	347
Ketoconazole	CHPM opnion	Industry	2012-06-08	Closed	2012-06-20	Yes	45
Roaccutane (isotretinoin)	Dossier	Media	2012-06-09	Closed	2012-06-20	Partial	13540
Cymbalta (duloxetine); Ariclaim (duloxetine)	AR	Media	2012-06-11	Closed	2012-06-12	No	0
Cymbalta (duloxetine)	AR	Consultant	2012-06-13	Batch Release	2012-11-05	Partial	32166
Xyrem (sodium oxybate)	AR	Consultant	2012-06-13	Closed	2012-10-19	Partial	1123
Xarelto (rivaroxaban)	AR, PSUR	Media	2012-06-13	Closed	2012-07-20	Partial	3004
Binocrit (epoetin alpha)	Labelling	Media	2012-06-15	Closed	2012-07-25	Partial	13
Enantiomer	3rd party documents	Legal	2012-06-18	Closed	2012-07-02	Yes	1
Zilcamva (maribavir)	COMP Opinion, LoQs, Minutes	Industry	2012-06-18	Closed	2012-06-20	No	0
Esbriet (pirfenidon)	Full Orphan drug application	Industry	2012-06-20	Closed	2012-07-03	Yes	556
Ceftazidime	ERA	Industry	2012-06-20	Closed	2012-06-20	No	0
Phv Inspection Reports	Inspection Reports	Industry	2012-06-22	Closed	2012-06-29	No	0
Glivec (imatinib)	RMP	Industry	2012-06-22	Closed	2012-07-26	Partial	167
Vincenzo Salvatore	Mixed documents	Media	2012-06-26	Closed	2012-08-01	Partial	14
Humira (adalimumab)	3rd party documents	Legal	2012-06-26	Closed	2012-07-17	No	0
Naglazyme (galsulfase)	PSUR	Patients organisation	2012-06-26	Closed	2012-07-18	No	0
Diflucan (fluconazole)	AR	Media	2012-06-28	Closed	2012-08-09	Partial	511
Tolperisone	AR	Industry	2012-06-28	Closed	2012-07-12	No	0
Inspection Report	Inspection Reports	Consultant	2012-06-28	Closed	2012-06-29	No	0
PDCO decision	SR	Industry	2012-06-29	Closed	2012-07-10	Partial	60
Public procurements	List of tenders	Consultant	2012-07-10	Closed	2012-07-16	Yes	10
Xavier Luria Oller	Mixed documents	Media	2012-07-04	Closed	2012-07-30	Partial	26
Staphylococcus	Designation	Media	2012-07-04	Closed	2012-07-16	No	0
Lantus (insulin glargine)	AR	Media	2012-07-01	Closed	2012-07-04	Yes	35
Byetta (exenatide); Bydureon (exenatide)	Studies	Industry	2012-07-05	Pending	2012-11-26	Partial	21321
MabCampath (alemtuzumab); Yervoy (ipilimumab); Arzerra (ofatumumab)	AR	Industry	2012-07-09	Closed	2012-07-30	Partial	919
Biosimilar Guideline - Comparability & Quality	3rd party documents	Legal	2012-07-10	Closed	2012-07-17	Partial	13
PDCO Decisions	PDCO Decisions	Media	2012-07-09	Closed	2012-07-10	Yes	9
Hizentra (human normal immunoglobulin)	PIP	Industry	2012-07-11	Closed	2012-07-17	No	0
SME Validation	Validation check lists	Industry	2012-07-17	Closed	2012-08-07	Partial	78
CHMP June 2011	Meeting minutes	Media	2012-07-19	Closed	2012-08-31	Partial	3
Infanrix Hexa	Dossier	General Public	2012-07-19	Closed	2012-07-27	Partial	107
Zinacef; Zinnaf	AR	Consultant	2012-07-20	Closed	2012-07-24	No	0
Keppra (levetiracetam)	CHMP minutes	Consultant	2012-07-20	Closed	2012-08-03	Partial	2
Calcitonin	Studies	Healthcare Professional	2012-07-23	Closed	2012-08-29	No	0
Forxiga (dapagliflozin)	MAA CHMP Opinion	Industry	2012-07-13	Closed	2012-08-10	No	0
Boehringer Ingelheim	List of own documents	Industry	2012-07-23	Closed	2012-07-25	No	0
Fendimetrazina	Dossier	General Public	2012-07-16	Closed	2012-08-01	Yes	46
HRT	CHMP reports	Legal	2012-07-24	Closed	2012-07-27	Yes	25
Revlimid (lenalidomide)	Dossier	Legal	2012-07-25	Batch Release	2012-10-24	Partial	849
Actos (pioglitazone)	RMP	Industry	2012-07-26	Closed	2012-08-06	No	0
Remicade (infliximab)	PIP	Legal	2012-07-26	Closed	2012-09-21	VOID	0
Vidaza (azacitidine)	Dossier	Industry	2012-07-26	Closed	2012-08-10	No	0
Calcitonin	Studies, AR	Healthcare Professional	2012-07-27	Closed	2012-08-14	No	0
Anti-retroviral therapy in HIV-infected populations	CSR	Healthcare Professional	2012-07-30	Closed	2012-08-22	Yes	1534
Calcitonin	Studies	Healthcare Professional	2012-07-30	Closed	2012-08-20	No	0
Innovator Products	RMP	Industry	2012-07-31	Closed	2012-11-09	Partial	2031
Remicade (infliximab)	SPC, PIP	Legal	2012-07-31	Batch Release	2012-10-23	Partial	2646
Vandetanib	PIP	Industry	2012-08-01	Closed	2012-08-03	No	0
Antidepressants	Unpublished data	Academia	2012-08-01	Pending	Pending		0
Altrenogest	MRL Report	Academia	2012-08-02	Closed	2012-08-15	Partial	979
Calcitonin	Studies	Healthcare Professional	2012-08-08	Closed	2012-08-20	No	0
Januvia (sitagliptin)	CSR	Industry	2012-08-03	Closed	2012-08-15	Partial	5641
Indacaterol (onbrez breezhaler)	Dossier	Industry	2012-08-06	Closed	2012-11-06	Partial	1204
Acomplia (rimonabant)	Resending of 2010+2011 replies	Legal	2012-08-08	Closed	2012-08-08	No	0
Esbriet (pirifenidon)	Dossier	Industry	2012-08-09	Pending	Pending		0
Ketek (telithromycin); Byetta (exenatide)	Dossier	Media	2012-08-10	Closed	2012-08-31	Partial	200
Rebif (interferon beta-1a); Extavia (interferon beta-1a); Pegasys (peginterferon alfa-2a); Cimzia (certolizumab pegol); Advate (octocog alfa); BeneFIX (nonacog alfa)	PSUR, RMP, CSR	Industry	2012-08-10	Batch Release	2012-10-18	Partial	12929
Protelos (strontium ranelate)	AR	Media	2012-08-10	Closed	2012-08-20	Yes	59
Lactobacillus tampons	CHMP document	Industry	2012-08-10	Closed	2012-09-03	Partial	11
Zimulti/Acomplia (rimonabant)	Dossier	Legal	2012-08-10	Batch Release	2012-09-27	No	0
Remicade (infliximab)	CSR	Consultant	2012-08-12	Closed	2012-09-03	Partial	66
Avastin (bevacizumab)	CTD module 4	Consultant	2012-08-16	Closed	2012-09-27	Partial	337
Humira (adalimumab)	Correspondence, presentations	Legal	2012-08-17	Closed	2012-10-29	No	0
Havrix Vaccine	PSUR	General Public	2012-08-18	Batch Release	2012-10-19	Partial	3577
Remicade (infliximab)	CTD module 4	Consultant	2012-08-20	Closed	2012-09-03	Partial	299
Protelos (strontium ranelate)	AR	Media	2012-08-21	Closed	2012-09-05	Yes	12
Pharmacovigilance fees	Financial, budget and fee estimates	Legal	2012-08-21	Pending	2012-10-03	Partial	40
Humira (adalimumab); Enbrel (etanercept); Simponi (golimumab)	CSR	Industry	2012-08-21	Closed	2012-11-09	Partial	337
Calcitonin	Studies	General Public	2012-08-22	Closed	2012-08-22	No	0
Tasigna (nilotinib)	Orphan designation	Institution	2012-08-20	Closed	2012-09-07	Partial	684
Forcalcitonin	Non-clinical reports	Industry	2012-08-24	Closed	2012-09-27	Partial	4
Intanza (influenza vaccine); Optaflu (influenza vaccine)	SPC	Media	2012-08-23	Closed	2012-08-29	No	0
Biopoin (epoetin theta)	Dossier	General Public	2012-09-10	Batch Release	2012-09-25	Partial	157
Tamiflu (oseltamivir)	Animal studies	Academia	2012-09-02	Batch Release	2012-10-04	Partial	155
Zyvox (linezolid)	PSURs	General Public	2012-09-02	Closed	2012-09-21	Partial	75
Binocrit (epoetin alpha); Nivestim (filgrastim); Retacrit (epoetin zeta); Tevagrastim (filgrastim); Zarzio (filgrastim)	Dossier	Academia	2012-09-04	Pending	Pending		0
Sutent (sunitinib)	Dossier	Industry	2012-09-05	Closed	2012-09-13	Partial	388
Alimta (pemetrexed)	Dossier	Industry	2012-09-05	Closed	2012-10-19	Partial	2885
Keppra (levetiracetam)	Dossier	Institution	2012-09-06	Closed	2012-09-07	Yes	167
Tavanic (levofloxacin)	Referrals	Media	2012-09-06	Pending	Pending	No	0
Zinnat (cefuroxime axetil)	Referrals	Media	2012-09-06	Batch Release	2012-10-31	Partial	386
Tazocin (piperacillin; tazobactam)	Referrals	Media	2012-09-06	Closed	2012-09-11	Yes	48
Merial (fipronil, praziquantel, s methoprene, eprinomectin)	EVVet reports	General Public	2012-06-01	Closed	2012-09-18	Yes	16
Calcitonin	CSR	General Public	2012-09-07	Closed	2012-09-27	No	0
Calcitonin	AR	Industry	2012-09-10	Closed	2012-10-03	Partial	432
Ketek (telithromycin)	PSUR, AR	Media	2012-09-10	Closed	2012-10-18	Partial	2356
IRR for study V87P4	Inspection Reports	General Public	2012-09-27	Closed	2012-10-02	No	0
Zinnat (cefuroxime axetil)	AR	Consultant	2012-09-10	Closed	2012-10-01	Yes	71
Teduglitide (Revestive)	EPAR	General Public	2012-09-11	Closed	2012-09-11	No	0
Zinforo (ceftaroline fosamil)	EPAR	Consultant	2012-09-13	Closed	2012-09-14	No	0
Brilique (ticagrelor)	CHMP LoQ, LoI	Industry	2012-09-14	Closed	2012-10-25	Partial	2044
Roche Inspection	Inspection Reports	Legal	2012-09-14	Closed	2012-09-18	No	0
Votubia (everolimus)	PL, Mock-ups	Media	2012-09-18	Closed	2012-09-27	Partial	17
Lucentis (ranibizumab)	Var AR	Industry	2012-09-14	Closed	2012-10-01	Partial	25
Cystadane (betaine anhydrous)	CSR	Industry	2012-09-25	Closed	2012-10-16	Yes	10
Pradaxa (dabigatran etexilate)	AR, PSUR	Industry	2012-09-19	Pending	Pending		0
Angiox (bivalirudin)	PIL	Legal	2012-09-19	Clarification	Clarification		0
Levemir (insulin detemir)	EPAR, AR	Media	2012-09-20	Closed	2012-10-12	No	0
Mirapexin (pramipexole); Sifrol (pramipexole)	RMP	Industry	2012-09-20	Closed	2012-10-12	Partial	648
Zavesca (miglustat)	AR	Industry	2012-09-25	Closed	2012-10-02	Yes	13
Levodopa; Carbidopa; Entacapone	Dossier	Industry	2012-09-25	Clarification	Clarification		0
Clopidgorel BMS	Dossier	Industry	2012-09-25	Clarification	Clarification		0
Zinacef (cefuroxime sodium); Zinnat (cefuroxime axetil	AR	Consultant	2012-09-25	Closed	2012-10-01	Yes	71
Omeprazole	RMP	Industry	2012-09-26	Closed	2012-10-01	No	0
Thymi herba/Primula radix	AR	Industry	2012-09-28	Closed	2012-10-04	Yes	32
Trimetazidine	Referrals	Industry	2012-09-28	Closed	2012-10-19	Partial	3
Remicade (infliximab)	CSR	Consultant	2012-10-01	Batch Release	2012-11-15	Partial	229
Remicade (infliximab)	AR, Dossier, PIP	Legal	2012-10-01	Closed	2012-11-06	Partial	2520
Avastin (bevacuzimab)	CTD module 2.7	Consultant	2012-10-02	Pending	Pending		0
Biosimilars	Q&A	Financial sector	2012-10-15	Closed	2012-10-16	Yes	2
CHMP Reports	CHMP Reports	Legal	2012-10-03	Closed	2012-10-04	No	0
Norvir (ritonavir)	AR	Media	2012-10-03	Closed	2012-10-12	Partial	172
Calcitonin	CSR	Industry	2012-10-02	Closed	2012-10-12	No	0
Zuprevo (tildipirosin)	PV data	Industry	2012-10-01	Closed	2012-10-05	Yes	19
Inlyta (axitinib)	Dossier	Industry	2012-10-05	Batch Release	2012-11-14	Partial	137
Adenuric (febuxostat)	Dossier	Institution	2012-10-08	Closed	2012-10-29	No	0
Orencia (abatacept)	PDCO Decisions	Industry	2012-10-08	Closed	2012-10-22	Partial	10
Kivexa (abacavir / lamivudine)	CSR	Legal	2012-10-08	Closed	2012-11-05	Partial	2683
Somatropin	Correspondence	Industry	2012-10-04	Closed	2012-11-08	Partial	1
Pioglitazone	CSR	Legal	2012-10-23	Closed	2012-11-16	Partial	181
Calcitonin	Dossier	Industry	2012-10-11	Closed	2012-11-13	No	0
Ferriprox (deferiprone)	Consultation	Institution	2012-10-11	Closed	2012-10-11	No	0
Galvus (vildagliptine)	AR, Var	Media	2012-10-11	Closed	2012-10-25	Partial	171
Lentiviral vector	COMP opinion	Legal	2012-10-15	Closed	2012-10-17	Partial	4
Biopoin (epoetin theta)	Correspondence	Industry	2012-10-15	Closed	2012-10-26	Yes	1
Antimalarials	Toxicity data	Academia	2012-10-15	Clarification	Clarification		0
Sycrest (asenapine)	AR, PSURs	Media	2012-10-16	Pending	Pending		0
MabThera (rituximab)	CSR	Consultant	2012-10-16	Pending	Pending		0
RotaTeq (rotavirus vaccine); Zostvax (shingles vaccine)	Dossier	Consultant	2012-10-16	Clarification	Clarification		0
Orphan designation products	Summary Reports	Industry	2012-10-17	Closed	2012-10-17	No	0
Replagal (agalsidase alfa); Fabrazyme (agalsidase beta)	AR	Academia	2012-10-17	Closed	2012-10-30	Partial	68
Urtica	CHMP documents	Institution	2012-10-18	Clarification	Clarification		0
Infanrix Hexa	Withdrawal announcement	General Public	2012-10-12	Closed	2012-11-06	Partial	9
CHMP Guideline	CHMP Guideline	General Public	2012-10-16	Closed	2012-10-19	Yes	32
Pandemrix (pandemic influenza vaccine)	AR, Correspondence, CHMP Report	Media	2012-10-22	Clarification	Clarification		0
Mono Tildem (diltiazem)	RMP	Industry	2012-10-19	Closed	2012-10-29	No	0
Prolia (denosumab)	PSUR	Academia	2012-10-23	Pending	Pending		0
Tamiflu (oseltamivir)	PSUR	Academia	2012-10-23	Pending	Pending		0
Priority list	List of studies	Academia	2012-10-24	Closed	2012-11-12	Yes	41
Ketek (telithromycin)	PSUR	Media	2012-10-25	Closed	2012-11-05	No	0
PEGylated drug products	SWP reports	Industry	2012-10-26	Closed	2012-11-15	No	0
Nimorazole	COMP minutes	Industry	2012-10-30	Closed	2012-11-05	Partial	119
Kaletra (lopinavir / ritonavir)	PSUR	Healthcare Professional	2012-11-05	Pending	Pending		0
Inspection reports	Inspection reports	Media	2012-11-05	Pending	Pending		0
Paediatric Vaccines	EPARs?	General Public	2012-11-06	Closed	2012-11-13	No	0
Humira (adalimumab)	ATDs; Correspondence	Legal	2012-11-08	Closed	2012-11-13	Partial	8707
Aprotinin	Decision for suspension	Industry	2012-11-08	Pending	Pending		0
Enbrel (etanercept)	ATDs	Industry	2012-11-12	Closed	2012-11-12	No	0
GCP	Inspection reports	General Public	2012-11-12	Pending	Pending		0
Hexaxim (diphtheria, tetanus, pertussis, hepatitis B)	SPC, EPAR	Institution	2012-11-09	Closed	2012-11-12	No	0
Humira (adalimumab)	Studies	Academia	2012-11-13	Pending	Pending		0
Optimark (gadoversetamide)	SIAMED reports	Consultant	2012-11-14	Open	Clarification received		0
Travatan (travoprost)	RMP	Industry	2012-11-14	Pending	Pending		0
Colobreathe (colistimethate sodium); Cayston (aztreonam); Dificlir (fidaxomicin)	Dossier	Consultant	2012-11-14	Open	Open		0
RMPs	RMPs	Media	2012-11-14	Clarification	Clarification		0
Tovanor Breezhaler (glycopyrronium bromide)	Dossier	Legal	2012-11-15	Open	Open		0
Seebri Breezhaler (glycopyrronium bromide)	Dossier	Legal	2012-11-15	Open	Open		0
Enurev Breezhaler (glycopyrronium bromide)	Dossier	Legal	2012-11-15	Open	Open		0
MabCampath (alemtuzumab)	ToC Module 1-5	Legal	2012-11-15	Open	Clarification received		0
							1655888
